# Supplementary material for: Multifunctional Fe3O4@SiO2nanoparticles for selective detection and removal of Hg2+ion in aqueous solution
Source: Royal Society of Chemistry journal article supplement (doi:10.1039/c4ra13487g), 2015-01-01
Supplement: c4ra13487g1.pdf [file c4ra13487g1.pdf]

## Supplementary Material

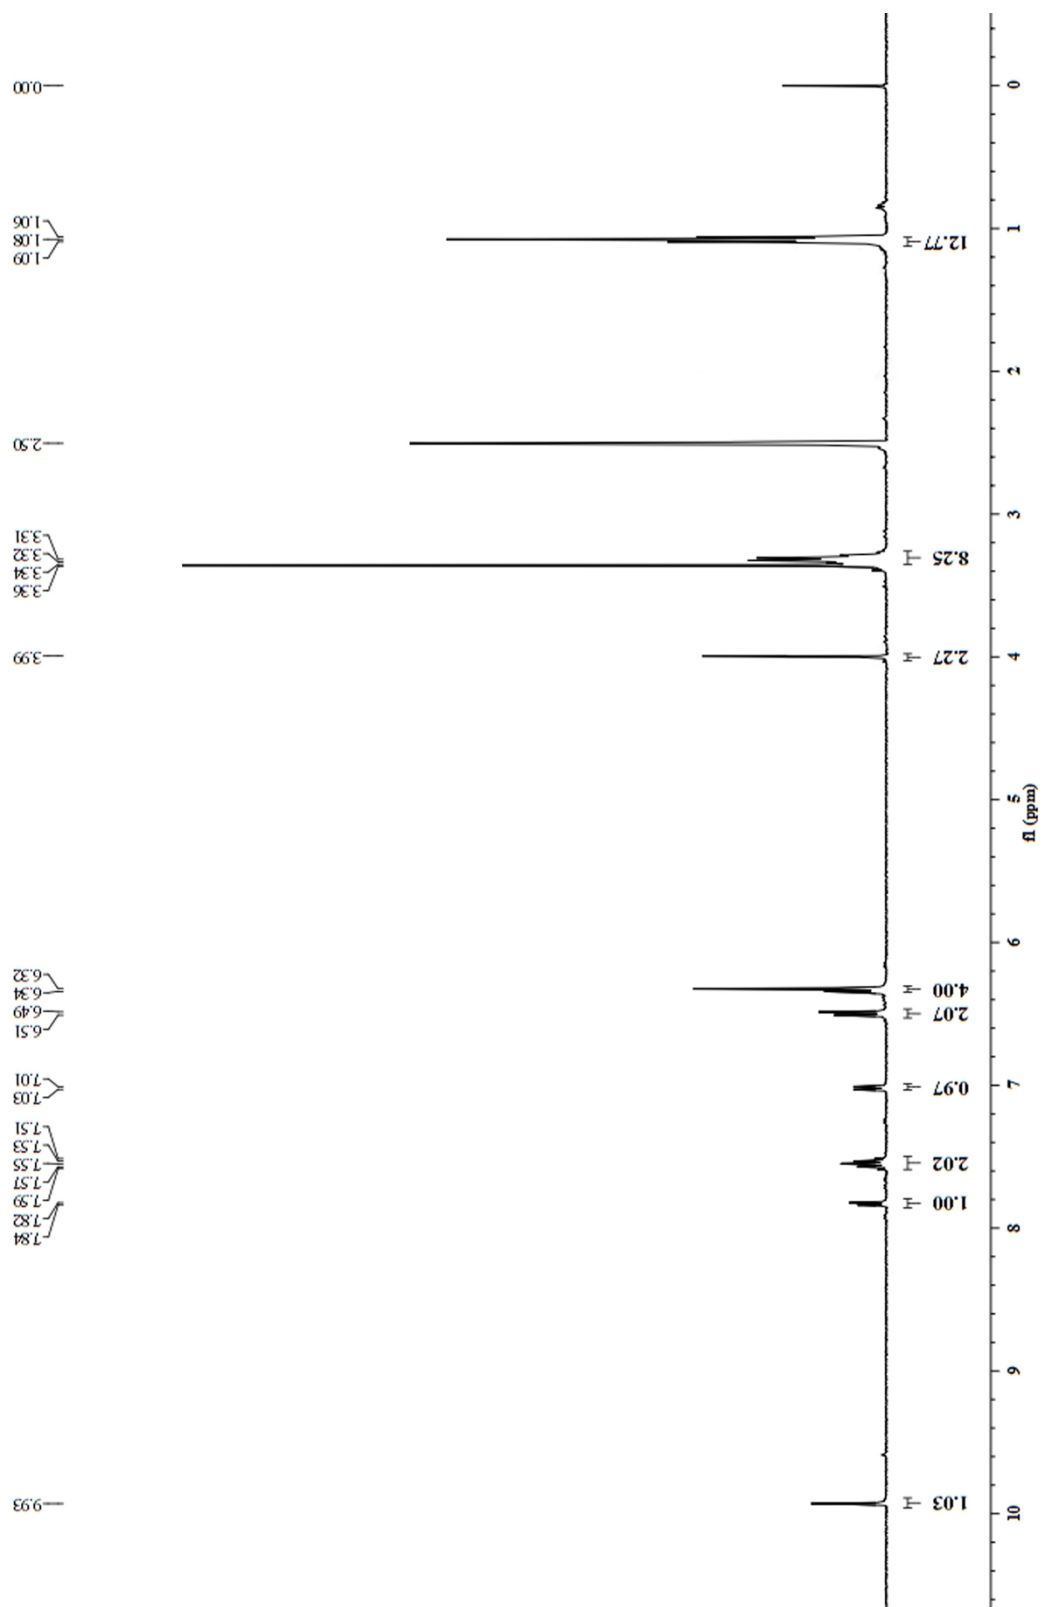

**Fig. S1**  $^1\text{H}$  NMR (DMSO, 400 MHz) spectrum of RB-Cl.

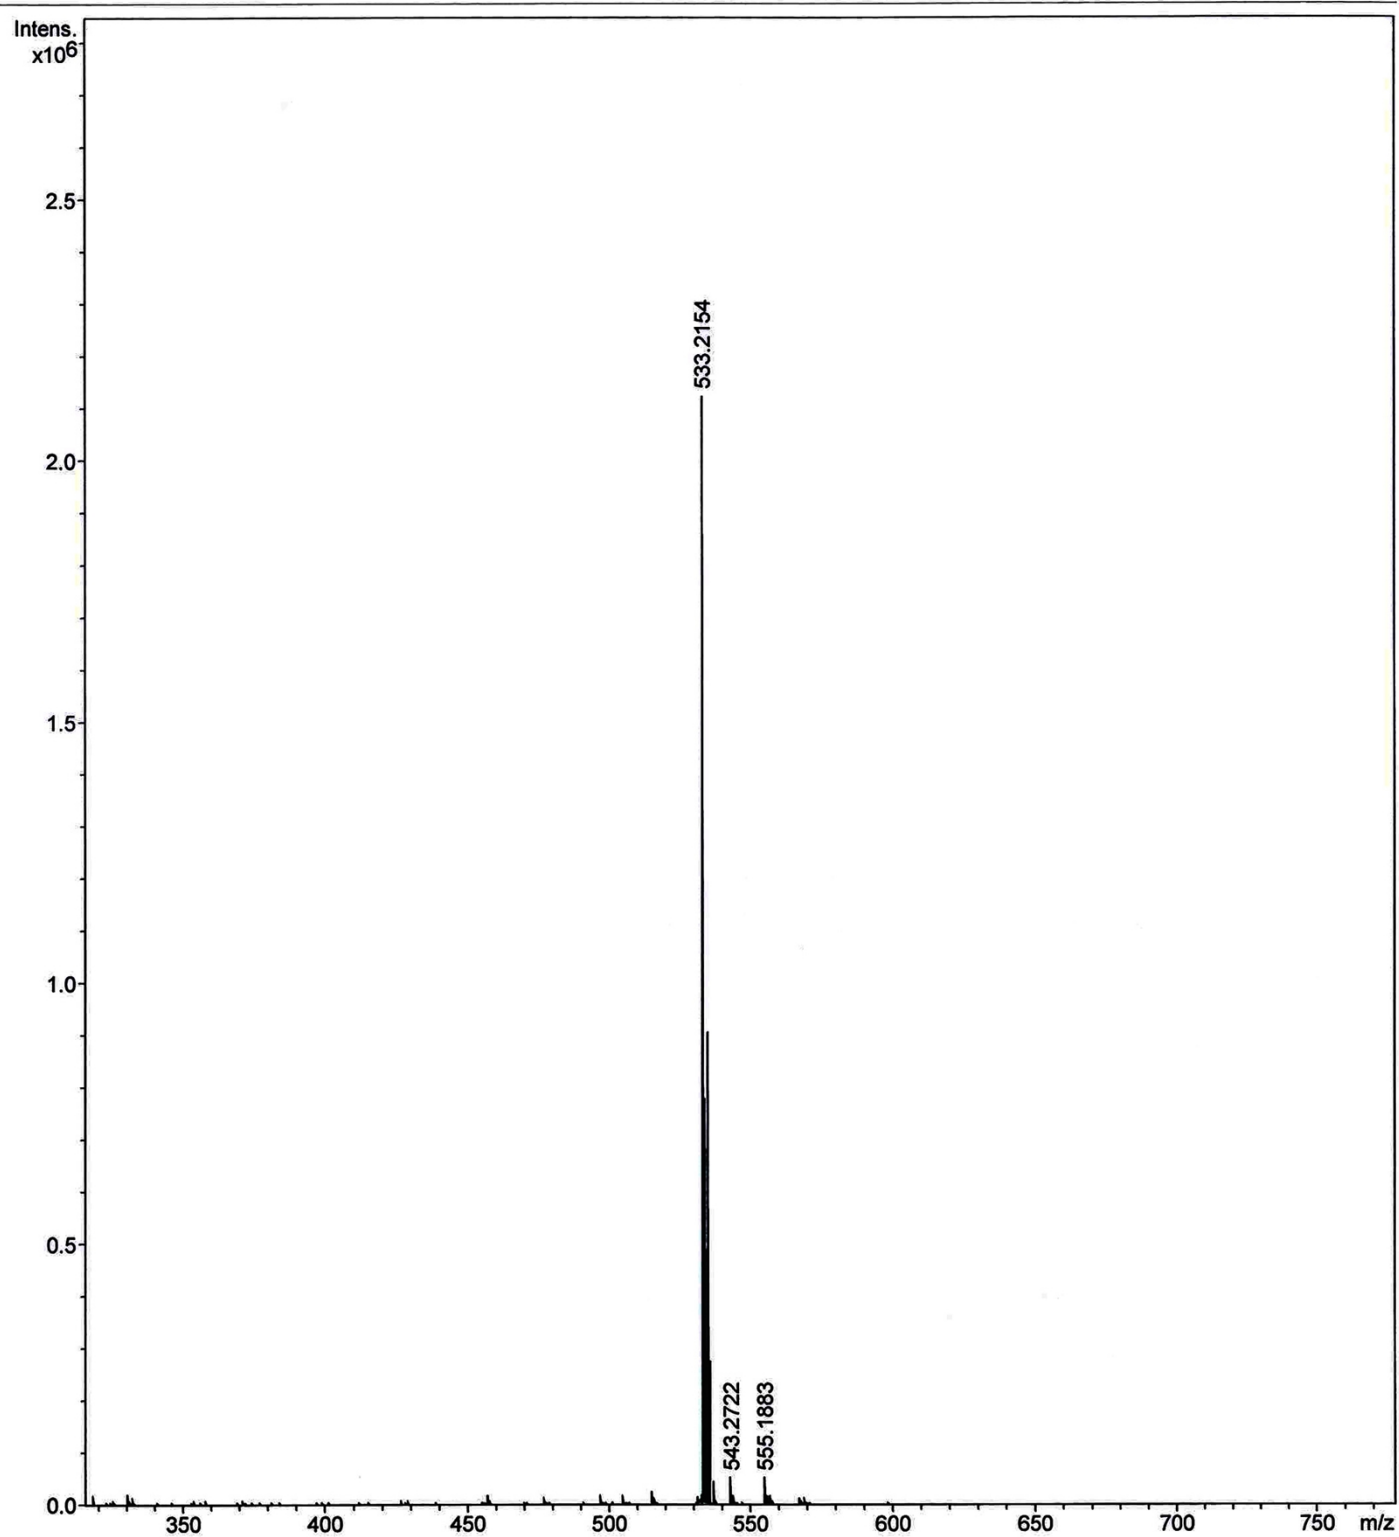

**Fig. S2** ESI-MS spectrum of RB-Cl.

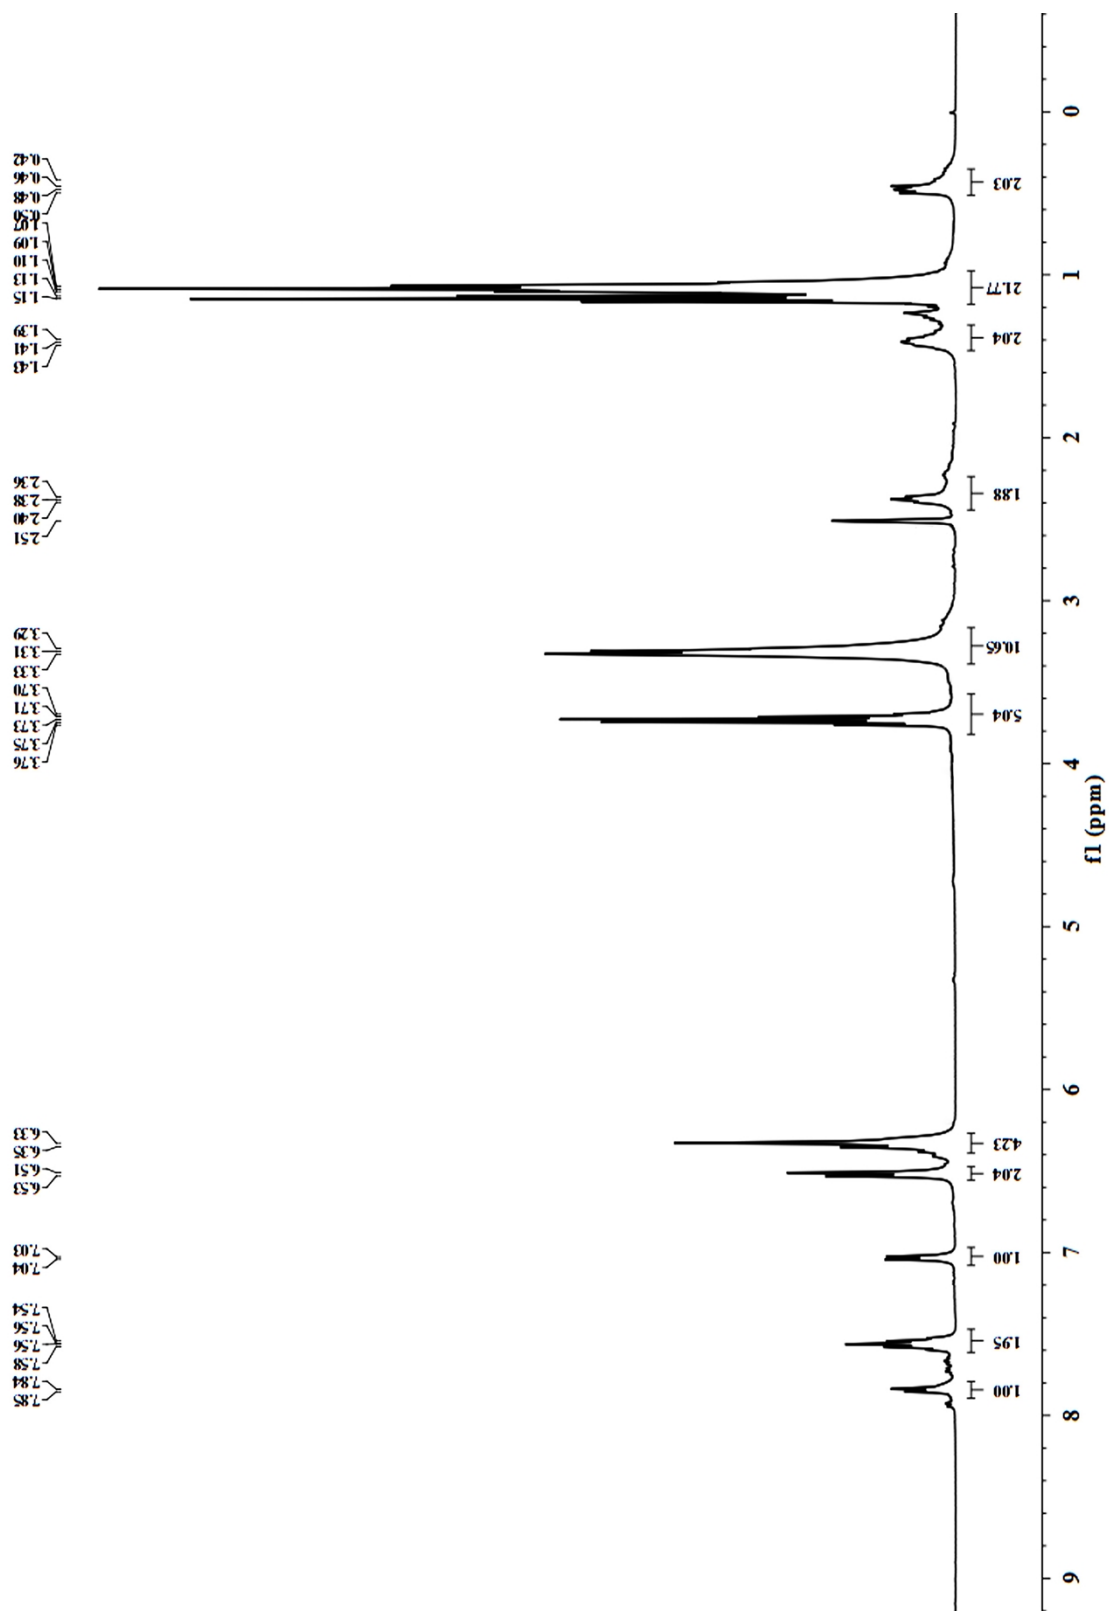

Fig. S3  $^1\text{H}$  NMR (DMSO, 400 MHz) spectrum of RB-Si.

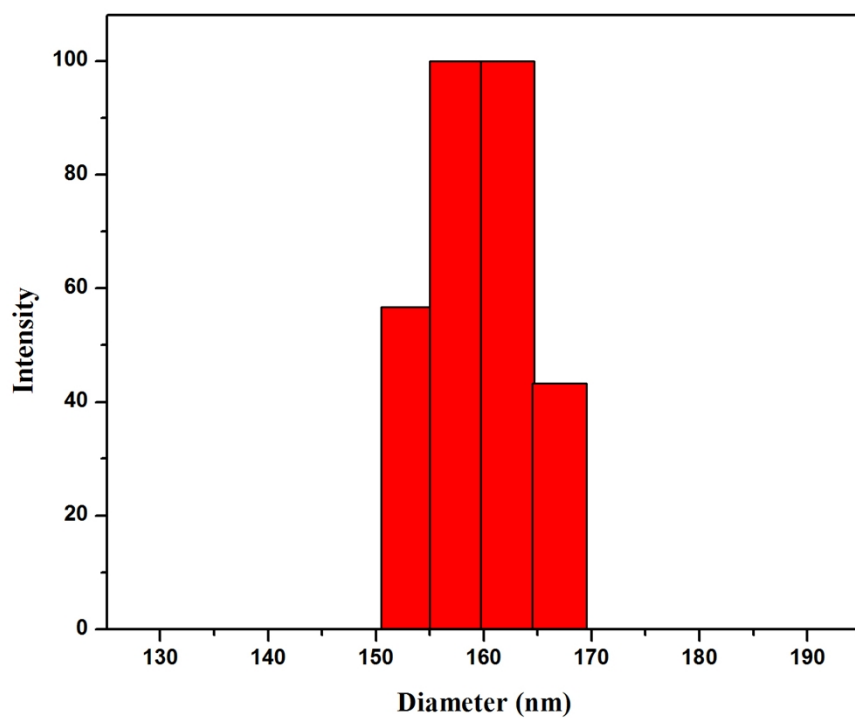

**Fig. S4** The particle size histogram from DLS of RB-Fe<sub>3</sub>O<sub>4</sub>@SiO<sub>2</sub>.

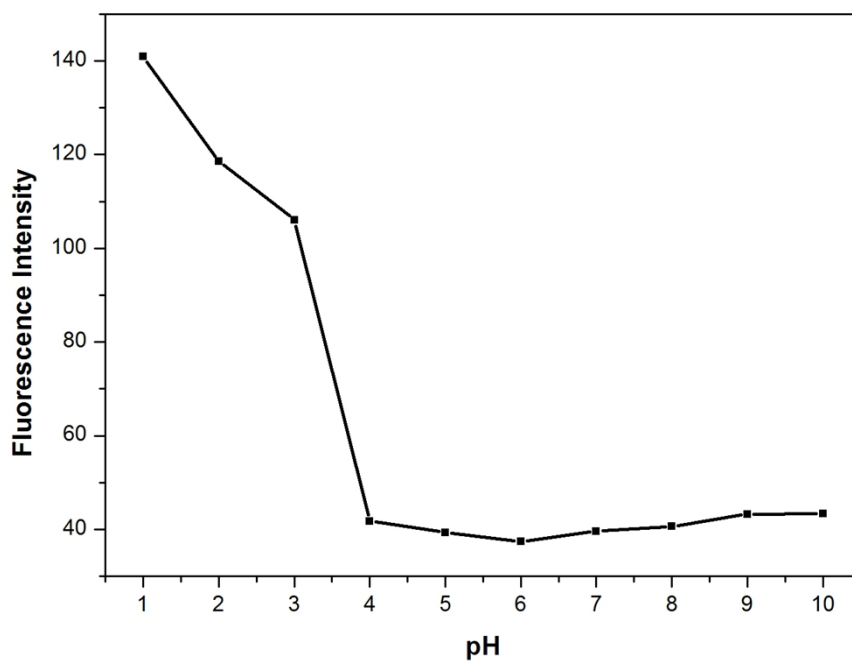

**Fig. S5** Fluorescence intensity of **RB-Fe<sub>3</sub>O<sub>4</sub>@SiO<sub>2</sub>** at various pH values in aqueous solution. Different pH values were achieved by varying the amount of 0.1 M NaOH/HCl added to the solution.  $\lambda_{\text{ex}} = 535 \text{ nm}$ ,  $\lambda_{\text{em}} = 582 \text{ nm}$ .
